# Supplementary material
Source: Springer Nature journal article supplement (https://www.springermedizin.de/resource/supplementary/13054_2011_9560_MOESM2_ESM.pdf/9706458)
Supplement: MOESM2 [file 9706458]

Cell cycling, WBC differentiation and cell growth modulation gene expression biomarkers

Innate and adaptive immune function and activation gene expression biomarkers

32%

56%

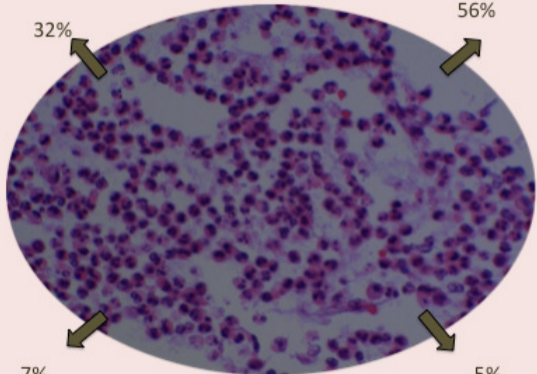

7%

Extracellular matrix remodeling gene expression biomarkers

5%

Immune modulating gene expression biomarkers
